# Supplementary material
Source: MDPI journal article supplement (https://www.mdpi.com/2071-1050/14/19/12859)
Supplement: s1 [file s1]

## Supplementary Material

**Table S1.** Construction conventions used in the system's designs.

| Item            | Conventions                                                                                                 |                                                         |
|-----------------|-------------------------------------------------------------------------------------------------------------|---------------------------------------------------------|
| Tanks           | Material                                                                                                    | Fibreglass                                              |
| Plumbing        | Material                                                                                                    | PVC                                                     |
|                 | Includes                                                                                                    | Raiwater distribution branches                          |
|                 |                                                                                                             | Tank overflow and cleaning exits                        |
|                 |                                                                                                             | Dry season potable water distribution backup            |
|                 |                                                                                                             | Motor pump branch (gravity-distributed system only)     |
| Civil works     | Tank cavity                                                                                                 | Manual excavation, 5cm gravel layer on levelled base    |
|                 |                                                                                                             | Masonry walls around cavity                             |
|                 |                                                                                                             | Prefabricated concrete lid                              |
|                 | Overflow                                                                                                    | Manual excavation                                       |
|                 |                                                                                                             | Prefabricated concrete inspection joints                |
| Rain collection | Gutters                                                                                                     | PVC - according to roof size                            |
|                 | Filter                                                                                                      | PVC filter according to NBR 15527 [6]                   |
|                 | First-flush                                                                                                 | 200L plastic barrels, according to roof area            |
|                 |                                                                                                             | Includes PVC plumbing and fixtures for operation        |
| Electrical      | Level sensors                                                                                               | Electric floats                                         |
|                 | Intake control                                                                                              | Solenoid valve (dry season - centralised water supply)  |
|                 | Power supply                                                                                                | Includes wires and conduits                             |
|                 | Motor pump                                                                                                  | ½ HP - 40% efficiency                                   |
|                 |                                                                                                             | Includes electric circuit board for automatic operation |
|                 | Pressuriser                                                                                                 | ½ HP                                                    |
|                 |                                                                                                             | Controlled by built-in pressure-switch                  |
|                 |                                                                                                             | Includes electric on/off board for operation            |
| Labour          | Considered in all items according to the SINAPI database of cost; compositions in the state of Paraná [33]. |                                                         |

**Table S2.** Water tariff scheme used in this research.

| Water consumption            | Tariff                   |
|------------------------------|--------------------------|
| Under 5m <sup>3</sup>        | BRL 73.36                |
| From 6 to 10 m <sup>3</sup>  | BRL 2.26/m <sup>3</sup>  |
| From 11 to 15 m <sup>3</sup> | BRL 12.63/m <sup>3</sup> |
| From 16 to 20m <sup>3</sup>  | BRL 12.70/m <sup>3</sup> |
| From 21 to 30 m <sup>3</sup> | BRL 12.81/m <sup>3</sup> |
| Above 30m <sup>3</sup>       | BRL 21.69/m <sup>3</sup> |

Note: On the 1<sup>st</sup> August 2022 BRL1.00 = USD 0.194 = GBP 0.159 = EUR 0.190

Source: SANEPAR [15].

**Table S3.** Main rainfall characterisation indexes obtained for Maringá.

| Average yearly rainfall (mm) | Average number of dry days per year (days) | Seasonality index (non-dimensional) |
|------------------------------|--------------------------------------------|-------------------------------------|
| 1805                         | 243.92                                     | 0.3157                              |

**Table S4.** Characterisation indexes for dry periods obtained for Maringá.

| Average duration of dry periods (days) | Standard deviation of dry periods (days) | Coefficient of variation of dry periods (%) | Maximum duration of dry periods (days) |
|----------------------------------------|------------------------------------------|---------------------------------------------|----------------------------------------|
| 4.50                                   | 5.44                                     | 1.21                                        | 47                                     |

**Table S5.** Simulation results for indirectly distributed RWH systems in Maringá.

| Roof area (m <sup>2</sup> ) | Number of inhabitants (inhab.) | Rainwater demand (%) | Rainwater demand (m <sup>3</sup> /month) | Ideal tank size (L) | Potential for potable water savings (%) |
|-----------------------------|--------------------------------|----------------------|------------------------------------------|---------------------|-----------------------------------------|
| 100                         | 2                              | 30                   | 2.7                                      | 5000                | 29.81                                   |
| 100                         | 2                              | 50                   | 4.5                                      | 6000                | 47.69                                   |
| 100                         | 2                              | 70                   | 6.3                                      | 6000                | 62.70                                   |
| 100                         | 4                              | 30                   | 5.4                                      | 6000                | 27.69                                   |
| 100                         | 4                              | 50                   | 9.0                                      | 8000                | 42.42                                   |
| 100                         | 4                              | 70                   | 12.6                                     | 7000                | 50.04                                   |
| 100                         | 6                              | 30                   | 8.1                                      | 7000                | 25.76                                   |
| 100                         | 6                              | 50                   | 13.5                                     | 7000                | 34.40                                   |
| 100                         | 6                              | 70                   | 18.9                                     | 6000                | 37.34                                   |
| 200                         | 2                              | 30                   | 2.7                                      | 4000                | 29.67                                   |
| 200                         | 2                              | 50                   | 4.5                                      | 5000                | 48.17                                   |
| 200                         | 2                              | 70                   | 6.3                                      | 6000                | 65.91                                   |
| 200                         | 4                              | 30                   | 5.4                                      | 6000                | 28.82                                   |
| 200                         | 4                              | 50                   | 9.0                                      | 7000                | 45.05                                   |
| 200                         | 4                              | 70                   | 12.6                                     | 8000                | 59.31                                   |
| 200                         | 6                              | 30                   | 8.1                                      | 7000                | 27.56                                   |
| 200                         | 6                              | 50                   | 13.5                                     | 8000                | 41.52                                   |
| 200                         | 6                              | 70                   | 18.9                                     | 9000                | 53.02                                   |
| 300                         | 2                              | 30                   | 2.7                                      | 4000                | 29.69                                   |
| 300                         | 2                              | 50                   | 4.5                                      | 5000                | 48.48                                   |
| 300                         | 2                              | 70                   | 6.3                                      | 6000                | 66.63                                   |
| 300                         | 4                              | 30                   | 5.4                                      | 6000                | 29.01                                   |
| 300                         | 4                              | 50                   | 9.0                                      | 7000                | 46.14                                   |
| 300                         | 4                              | 70                   | 12.6                                     | 8000                | 61.65                                   |
| 300                         | 6                              | 30                   | 8.1                                      | 7000                | 28.12                                   |
| 300                         | 6                              | 50                   | 13.5                                     | 9000                | 44.15                                   |
| 300                         | 6                              | 70                   | 18.9                                     | 9000                | 56.44                                   |

**Table S6.** Simulation results for directly distributed RWH systems in Maringá.

| Roof area<br>(m <sup>2</sup> ) | Number of<br>inhabitants (inhab.) | Rainwater<br>demand (%) | Rainwater<br>demand<br>(m <sup>3</sup> /month) | Ideal tank<br>size (L) | Potential for potable<br>water savings (%) |
|--------------------------------|-----------------------------------|-------------------------|------------------------------------------------|------------------------|--------------------------------------------|
| 100                            | 2                                 | 30                      | 2.7                                            | 5000                   | 29.81                                      |
| 100                            | 2                                 | 50                      | 4.5                                            | 6000                   | 47.65                                      |
| 100                            | 2                                 | 70                      | 6.3                                            | 7000                   | 63.72                                      |
| 100                            | 4                                 | 30                      | 5.4                                            | 6000                   | 27.64                                      |
| 100                            | 4                                 | 50                      | 9.0                                            | 8000                   | 42.29                                      |
| 100                            | 4                                 | 70                      | 12.6                                           | 7000                   | 49.83                                      |
| 100                            | 6                                 | 30                      | 8.1                                            | 7000                   | 25.68                                      |
| 100                            | 6                                 | 50                      | 13.5                                           | 7000                   | 34.25                                      |
| 100                            | 6                                 | 70                      | 18.9                                           | 6000                   | 36.95                                      |
| 200                            | 2                                 | 30                      | 2.7                                            | 4000                   | 29.66                                      |
| 200                            | 2                                 | 50                      | 4.5                                            | 5000                   | 48.10                                      |
| 200                            | 2                                 | 70                      | 6.3                                            | 6000                   | 65.80                                      |
| 200                            | 4                                 | 30                      | 5.4                                            | 6000                   | 28.77                                      |
| 200                            | 4                                 | 50                      | 9.0                                            | 7000                   | 44.94                                      |
| 200                            | 4                                 | 70                      | 12.6                                           | 8000                   | 59.08                                      |
| 200                            | 6                                 | 30                      | 8.1                                            | 7000                   | 27.50                                      |
| 200                            | 6                                 | 50                      | 13.5                                           | 9000                   | 42.18                                      |
| 200                            | 6                                 | 70                      | 18.9                                           | 9000                   | 52.70                                      |
| 300                            | 2                                 | 30                      | 2.7                                            | 4000                   | 29.68                                      |
| 300                            | 2                                 | 50                      | 4.5                                            | 5000                   | 48.41                                      |
| 300                            | 2                                 | 70                      | 6.3                                            | 6000                   | 66.53                                      |
| 300                            | 4                                 | 30                      | 5.4                                            | 6000                   | 28.97                                      |
| 300                            | 4                                 | 50                      | 9.0                                            | 7000                   | 46.01                                      |
| 300                            | 4                                 | 70                      | 12.6                                           | 9000                   | 62.53                                      |
| 300                            | 6                                 | 30                      | 8.1                                            | 7000                   | 28.06                                      |
| 300                            | 6                                 | 50                      | 13.5                                           | 9000                   | 43.97                                      |
| 300                            | 6                                 | 70                      | 18.9                                           | 9000                   | 56.08                                      |

**Table S7.** Initial outlays for RWH systems with indirect rainwater distribution.

| <b>Catchment area = 100m<sup>2</sup></b> |           |              |                 |                     |                |             |
|------------------------------------------|-----------|--------------|-----------------|---------------------|----------------|-------------|
| Tank size (L)                            | Tanks (%) | Plumbing (%) | Civil works (%) | Rain collection (%) | Electrical (%) | Total (BRL) |
| 3000                                     | 14.72     | 28.39        | 19.11           | 23.57               | 14.21          | 9696.27     |
| 4000                                     | 19.15     | 26.12        | 19.98           | 21.69               | 13.07          | 10,539.29   |
| 5000                                     | 23.13     | 24.06        | 20.79           | 19.98               | 12.04          | 11,439.27   |
| 6000                                     | 26.82     | 22.31        | 21.18           | 18.52               | 11.17          | 12,339.35   |
| 7000                                     | 30.18     | 20.71        | 21.54           | 17.20               | 10.37          | 13,289.68   |
| 8000                                     | 33.24     | 19.26        | 21.86           | 16.00               | 9.64           | 14,290.26   |
| 9000                                     | 36.02     | 17.94        | 22.16           | 14.90               | 8.98           | 15,341.09   |
| Average                                  | 26.18     | 22.68        | 20.94           | 18.84               | 11.35          | -           |
| <b>Catchment area = 200m<sup>2</sup></b> |           |              |                 |                     |                |             |
| Tank size (L)                            | Tanks (%) | Plumbing (%) | Civil works (%) | Rain collection (%) | Electrical (%) | Total (BRL) |
| 3000                                     | 13.39     | 25.81        | 17.37           | 30.51               | 12.92          | 10,663.95   |
| 4000                                     | 17.54     | 23.92        | 18.30           | 28.27               | 11.97          | 11,506.97   |
| 5000                                     | 21.32     | 22.18        | 19.17           | 26.22               | 11.10          | 12,406.95   |
| 6000                                     | 24.87     | 20.68        | 19.64           | 24.45               | 10.35          | 13,307.03   |
| 7000                                     | 28.14     | 19.31        | 20.08           | 22.82               | 9.66           | 14,257.36   |
| 8000                                     | 31.13     | 18.04        | 20.48           | 21.32               | 9.03           | 15,257.94   |
| 9000                                     | 33.88     | 16.88        | 20.84           | 19.95               | 8.45           | 16,308.77   |
| Average                                  | 24.32     | 20.97        | 19.41           | 24.79               | 10.50          | -           |
| <b>Catchment area = 300m<sup>2</sup></b> |           |              |                 |                     |                |             |
| Tank size (L)                            | Tanks (%) | Plumbing (%) | Civil works (%) | Rain collection (%) | Electrical (%) | Total (BRL) |
| 3000                                     | 12.51     | 24.12        | 16.23           | 35.07               | 12.07          | 11,412.88   |
| 4000                                     | 16.47     | 22.46        | 17.18           | 32.66               | 11.24          | 12,255.90   |
| 5000                                     | 20.11     | 20.92        | 18.08           | 30.42               | 10.47          | 13,155.88   |
| 6000                                     | 23.55     | 19.58        | 18.59           | 28.47               | 9.80           | 14,055.96   |
| 7000                                     | 26.73     | 18.34        | 19.07           | 26.67               | 9.18           | 15,006.29   |
| 8000                                     | 29.68     | 17.20        | 19.52           | 25.00               | 8.61           | 16,006.87   |
| 9000                                     | 32.39     | 16.14        | 19.93           | 23.46               | 8.08           | 17,057.71   |
| Average                                  | 23.06     | 19.82        | 18.37           | 28.82               | 9.92           | -           |

Note: On the 1<sup>st</sup> August 2022 BRL1.00 = USD 0.194 = GBP 0.159 = EUR 0.190

**Table S8.** Initial outlays for RWH systems with direct rainwater distribution.

| <b>Catchment area = 100m<sup>2</sup></b> |           |              |                 |                     |                |             |
|------------------------------------------|-----------|--------------|-----------------|---------------------|----------------|-------------|
| Tank size (L)                            | Tanks (%) | Plumbing (%) | Civil works (%) | Rain collection (%) | Electrical (%) | Total (BRL) |
| 3000                                     | 12.69     | 19.15        | 26.74           | 17.79               | 23.63          | 9674.46     |
| 4000                                     | 17.29     | 20.02        | 24.60           | 16.37               | 21.73          | 10,517.48   |
| 5000                                     | 21.42     | 20.83        | 22.66           | 15.08               | 20.02          | 11,417.46   |
| 6000                                     | 25.25     | 21.22        | 21.00           | 13.97               | 18.56          | 12,317.54   |
| 7000                                     | 28.73     | 21.57        | 19.50           | 12.97               | 17.23          | 13,267.87   |
| 8000                                     | 31.89     | 21.90        | 18.13           | 12.06               | 16.02          | 14,268.45   |
| 9000                                     | 34.77     | 22.19        | 16.89           | 11.24               | 14.92          | 15,319.28   |
| Average                                  | 24.58     | 20.98        | 21.36           | 14.21               | 18.87          | -           |
| <b>Catchment area = 200m<sup>2</sup></b> |           |              |                 |                     |                |             |
| Tank size (L)                            | Tanks (%) | Plumbing (%) | Civil works (%) | Rain collection (%) | Electrical (%) | Total (BRL) |
| 3000                                     | 11.54     | 17.41        | 24.31           | 16.17               | 30.57          | 10,642.14   |
| 4000                                     | 15.83     | 18.33        | 22.52           | 14.99               | 28.33          | 11,485.16   |
| 5000                                     | 19.75     | 19.20        | 20.89           | 13.90               | 26.27          | 12,385.14   |
| 6000                                     | 23.41     | 19.67        | 19.47           | 12.96               | 24.49          | 13,285.22   |
| 7000                                     | 26.78     | 20.11        | 18.17           | 12.09               | 22.85          | 14,235.55   |
| 8000                                     | 29.87     | 20.51        | 16.98           | 11.30               | 21.35          | 15,236.13   |
| 9000                                     | 32.70     | 20.87        | 15.88           | 10.57               | 19.98          | 16,286.96   |
| Average                                  | 22.84     | 19.44        | 19.75           | 13.14               | 24.83          | -           |
| <b>Catchment area = 300m<sup>2</sup></b> |           |              |                 |                     |                |             |
| Tank size (L)                            | Tanks (%) | Plumbing (%) | Civil works (%) | Rain collection (%) | Electrical (%) | Total (BRL) |
| 3000                                     | 10.78     | 16.26        | 22.71           | 15.11               | 35.14          | 11,391.07   |
| 4000                                     | 14.86     | 17.21        | 21.15           | 14.07               | 32.71          | 12,234.09   |
| 5000                                     | 18.62     | 18.11        | 19.70           | 13.11               | 30.47          | 13,134.07   |
| 6000                                     | 22.16     | 18.62        | 18.43           | 12.26               | 28.52          | 14,034.15   |
| 7000                                     | 25.44     | 19.10        | 17.26           | 11.49               | 26.71          | 14,984.48   |
| 8000                                     | 28.47     | 19.54        | 16.18           | 10.77               | 25.04          | 15,985.06   |
| 9000                                     | 31.26     | 19.95        | 15.19           | 10.10               | 23.49          | 17,035.90   |
| Average                                  | 21.66     | 18.40        | 18.66           | 12.42               | 28.87          | -           |

Note: On the 1<sup>st</sup> August 2022 BRL1.00 = USD 0.194 = GBP 0.159 = EUR 0.190

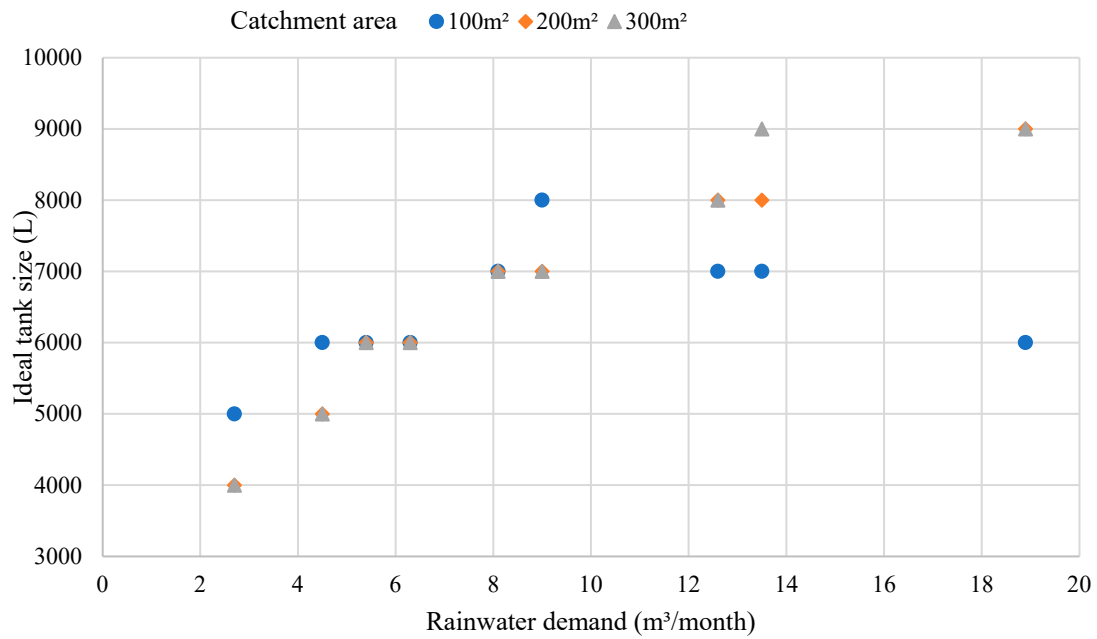

**Figure S1.** Ideal tank size as a function of rainwater demand for indirectly distributed RWH systems in Maringá.

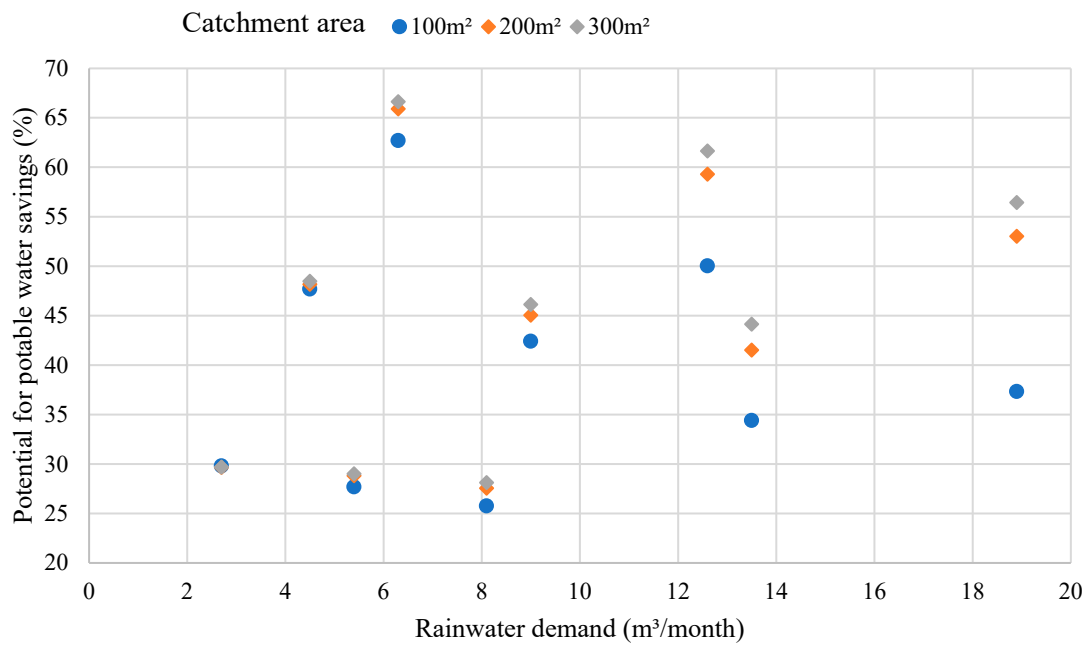

**Figure S2.** Potential for potable water savings as a function of rainwater demand for indirectly distributed RWH systems in Maringá.

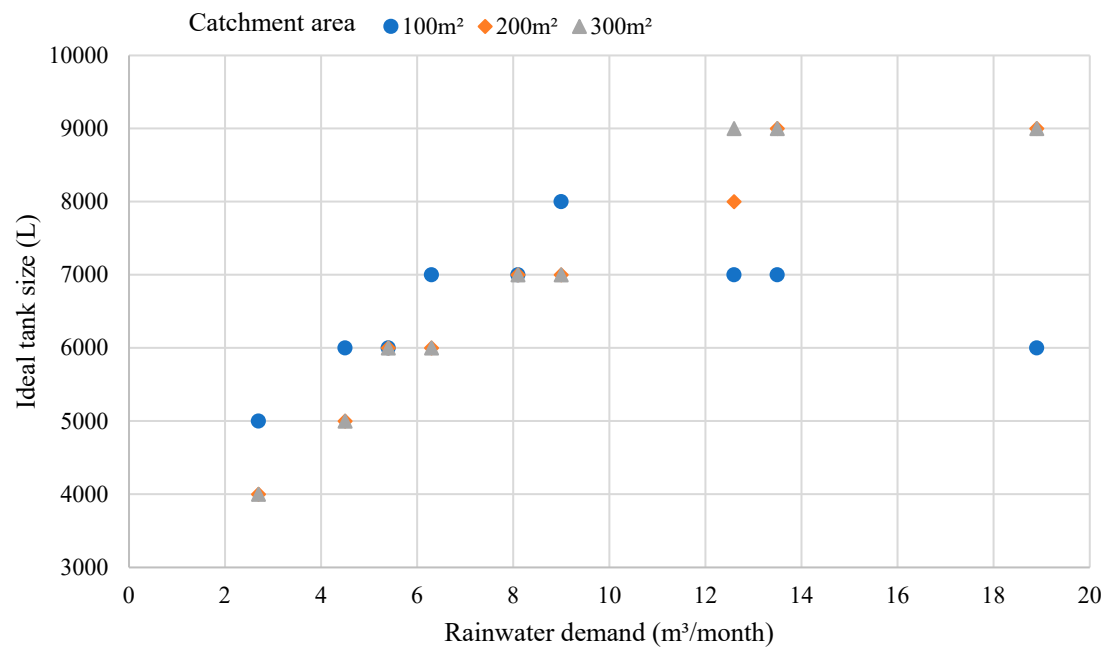

**Figure S3.** Ideal tank size as a function of rainwater demand for directly distributed RWH systems in Maringá.

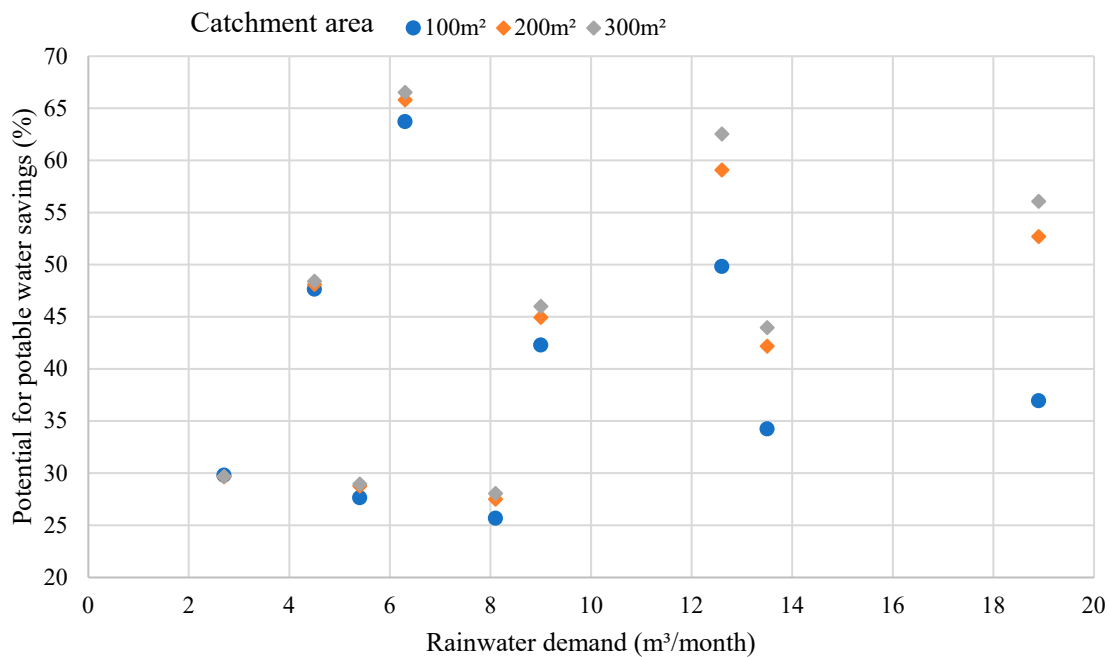

**Figure S4.** Potential for potable water savings as a function of rainwater demand for directly distributed RWH systems in Maringá.
